# Supplementary material for: Dissipative Particle Dynamics Study on Interfacial Properties of Symmetric Ternary Polymeric Blends
Source: MDPI journal article supplement (doi:10.3390/polym13091516), 2021-05-08
Supplement: s1 [file s1]

Article

# Dissipative Particle Dynamics Study on Interfacial Properties of Symmetric Ternary Polymeric Blends

Dongmei Liu <sup>1,\*</sup>, Kai Gong <sup>1</sup>, Ye Lin <sup>1</sup>, Tao Liu <sup>1,\*</sup>, Yu Liu <sup>1</sup> and Xiaozheng Duan <sup>2,3,\*</sup>

<sup>1</sup> School of Science, North China University of Science and Technology, Tangshan, 063210, P. R. China; dmlu@ncst.edu.cn (D.L.); gongkai0524@163.com (K. G.); linye315317@163.com (Y.L.); liutaocreate@gmail.com (T.L.); vampireliu@outlook.com (Y.L.)

<sup>2</sup> State Key Laboratory of Polymer Physics and Chemistry, Changchun Institute of Applied Chemistry, Chinese Academy of Science, Changchun, 130022, P. R. China; xzduan@ciac.ac.cn (X.D.)

<sup>3</sup> State Key Laboratory of Molecular Engineering of Polymers, Department of Macromolecular Science, Fudan University, Shanghai, 200438, P. R. China; xzduan@ciac.ac.cn (X.D.)

\* Correspondence: dmlu@ncst.edu.cn; Tel.: +86-315-8805860 (D.L.); liutaocreate@gmail.com; Tel.: +86-315-8805860 (T.L.); xzduan@ciac.ac.cn; Tel.: +86-431-85262479 (X.D.)

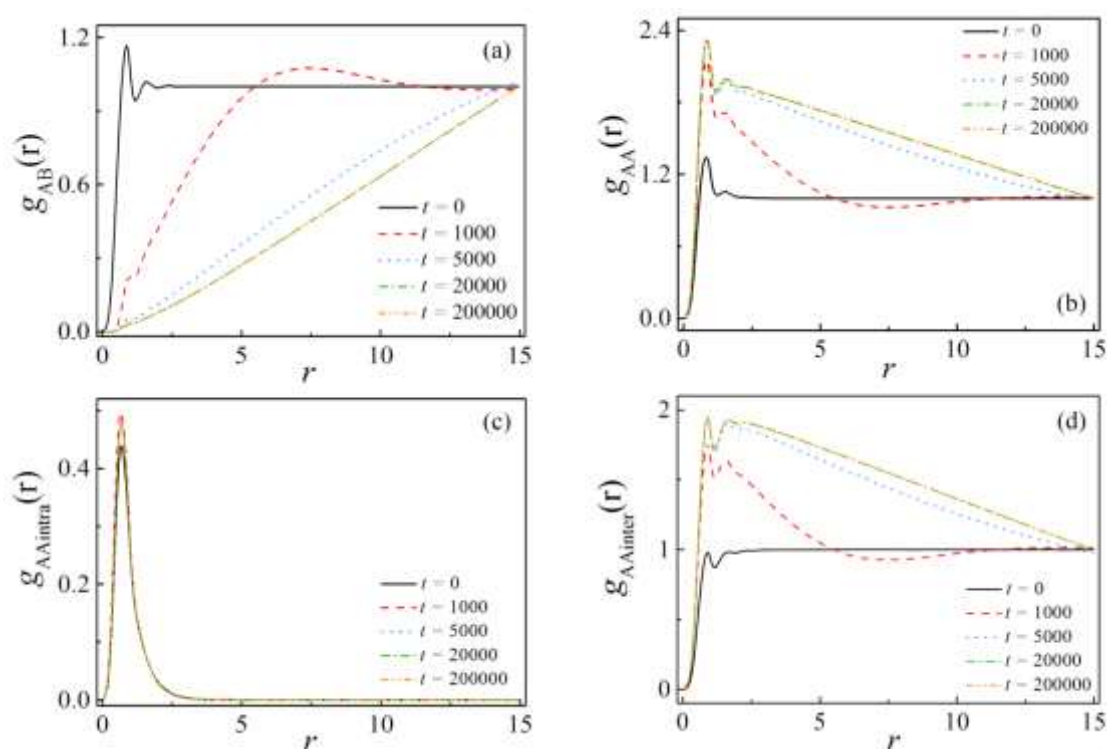

**Figure S1.** The radial distribution functions between (a) beads A and B [ $g_{AB}(r)$ ] from homopolymers  $A_n$  and  $B_n$ , (b) beads A and A [ $g_{AA}(r)$ ] of all homopolymers  $A_n$ , (c) beads A and A [ $g_{AAintra}(r)$ ] within homopolymers  $A_n$ , and (d) beads A and A [ $g_{AAinter}(r)$ ] within different homopolymers  $A_n$  for the case  $A_8/A_4B_4/B_8$  at different simulation times. The copolymer concentration is set as  $c_{cp} = 0.05$ .

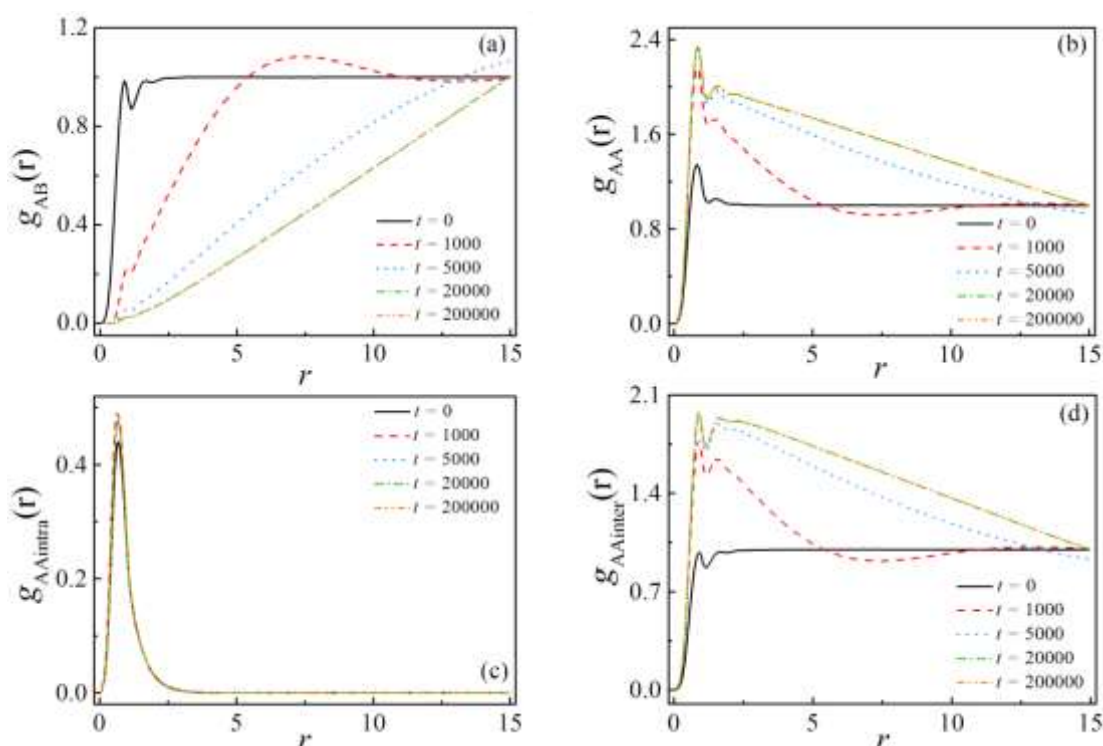

**Figure S2.** The radial distribution functions between (a) beads A and B [ $g_{AB}(r)$ ] from homopolymers  $A_n$  and  $B_n$ , (b) beads A and A [ $g_{AA}(r)$ ] of all homopolymers  $A_n$ , (c) beads A and A [ $g_{AAintra}(r)$ ] within homopolymers  $A_n$ , and (d) beads A and A [ $g_{AAinter}(r)$ ] with different homopolymers  $A_n$  for the case  $A_8/A_2B_4A_2/B_8$  at different simulation times. The copolymer concentration is set as  $c_{cp} = 0.05$ .

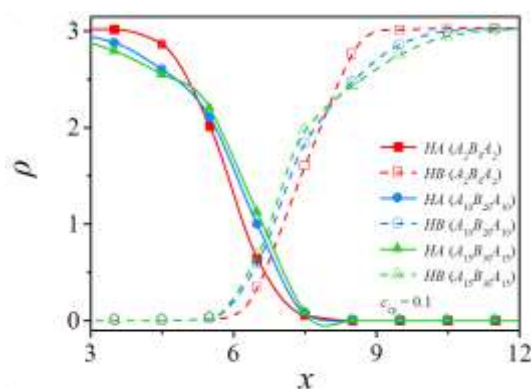

**Figure S3.** The zoom of Figure 5(a) at the interface.

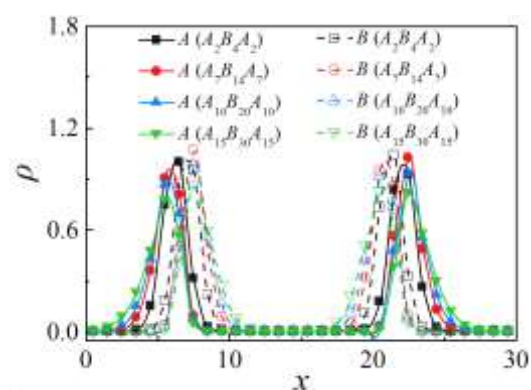

**Figure S4.** Density profiles of beads A, B of the triblock copolymer along the  $x$ -axis as a function of chain length of the copolymer at the copolymer concentration of  $c_{cp} = 0.1$ .

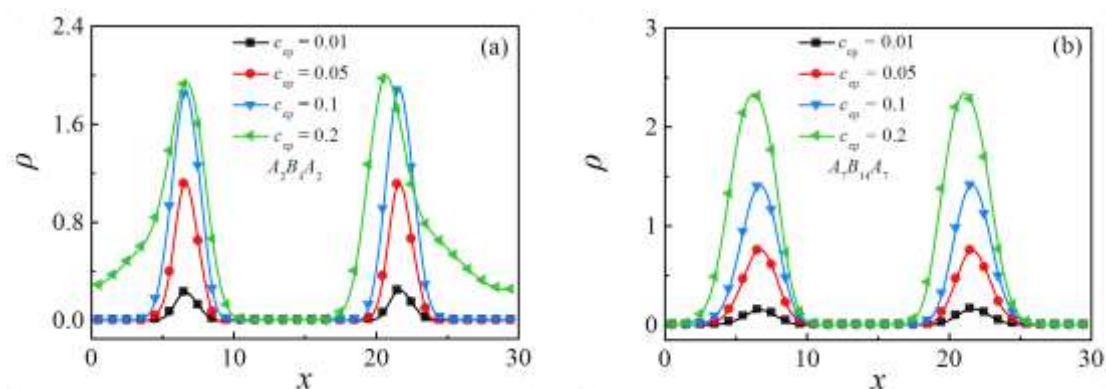

**Figure S5.** Density profiles of beads A + B of the triblock copolymer along the  $x$ -axis as a function of triblock copolymer concentration at the copolymer chain length (a)  $N_{cp} = 8$ , and (b)  $N_{cp} = 28$ .

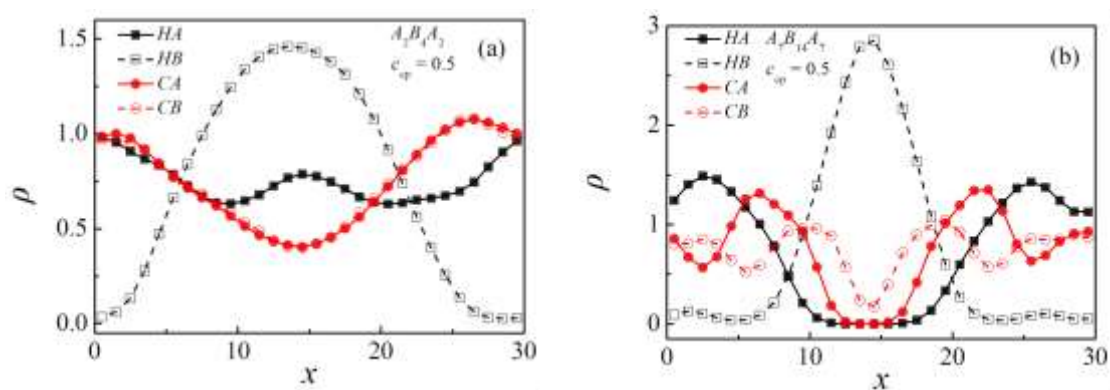

**Figure S6.** Density profiles of beads A and B of the homopolymers and triblock copolymer along the  $x$ -axis at the copolymer chain length (a)  $N_{cp} = 8$ , and (b)  $N_{cp} = 28$  with triblock copolymer concentration  $c_{cp} = 0.5$ .

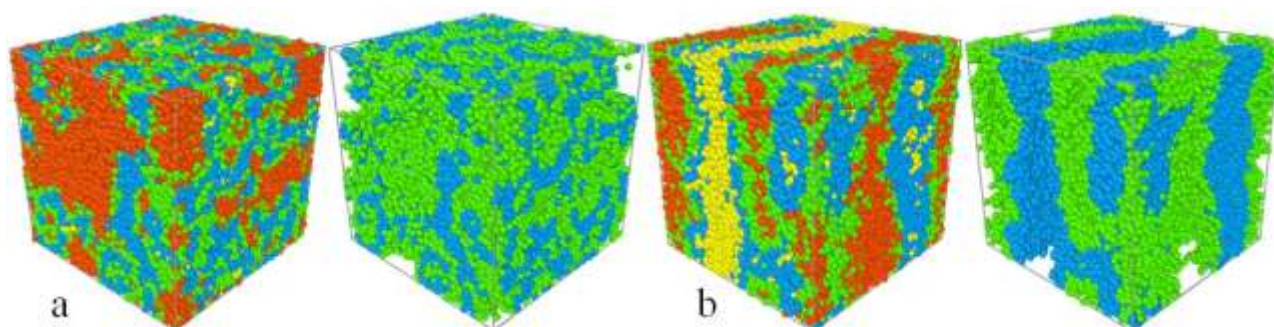

**Figure S7.** Representative morphology snapshots for ternary mixtures at triblock copolymer concentration  $c_{cp} = 0.5$ . The compositions are  $A_8/A_2B_4A_2/B_8$  for (a), and  $A_8/A_7B_{14}A_7/B_8$  for (b). The red and yellow spheres represent bead A and bead B of homopolymers, and the green and blue spheres represent beads A and B of the copolymers.
